# Supplementary material for: Actualizing efficient photocatalytic water oxidation over SrTaO2N by Na modification
Source: Royal Society of Chemistry journal article supplement (doi:10.1039/c7cy01580a), 2017-01-01
Supplement: c7cy01580a1.pdf [file c7cy01580a1.pdf]

## Supplementary Information

# Actualizing efficient photocatalytic water oxidation over SrTaO<sub>2</sub>N by Na modification

Fangfang Wu<sup>a</sup>, Gang Liu<sup>b</sup> and Xiaoxiang Xu<sup>a,\*</sup>

<sup>a</sup>Shanghai Key Lab of Chemical Assessment and Sustainability, School of Chemical Science and Engineering, Tongji University, 1239 Siping Road, Shanghai, 200092, China

Email: [xxxu@tongji.edu.cn](mailto:xxxu@tongji.edu.cn), telephone: +86-21-65986919

<sup>b</sup>Shenyang National laboratory for Materials Science, Institute of Metal Research, Chinese Academy of Science, 72 Wenhua Road, Shenyang 110016, China

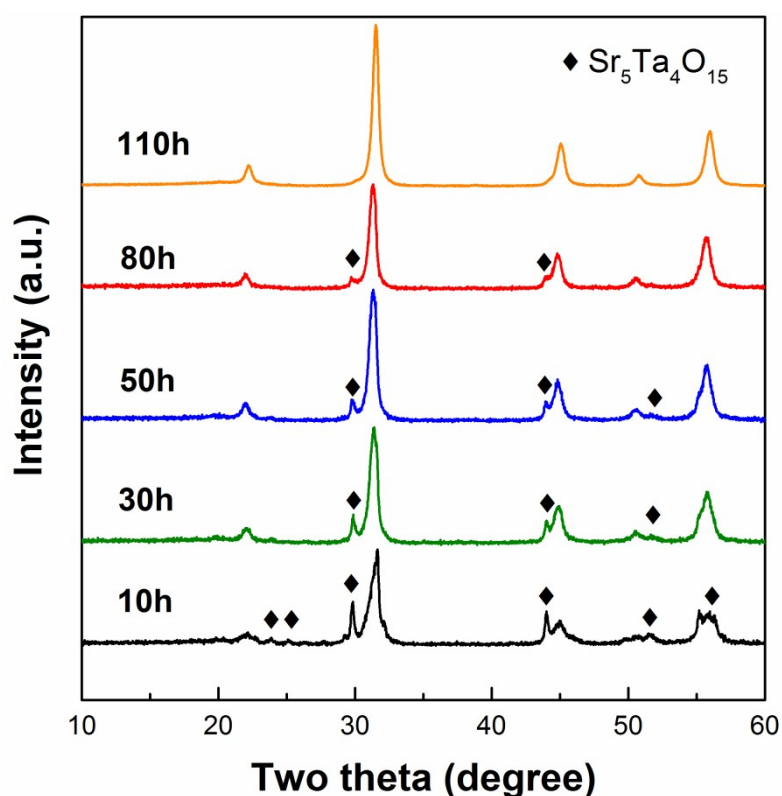

Figure S1. XRD patterns of amorphous precursors ammonolyzed at 900 °C for different time. Impurity peaks of Sr<sub>5</sub>Ta<sub>4</sub>O<sub>15</sub> were progressively depressed along with reaction time.

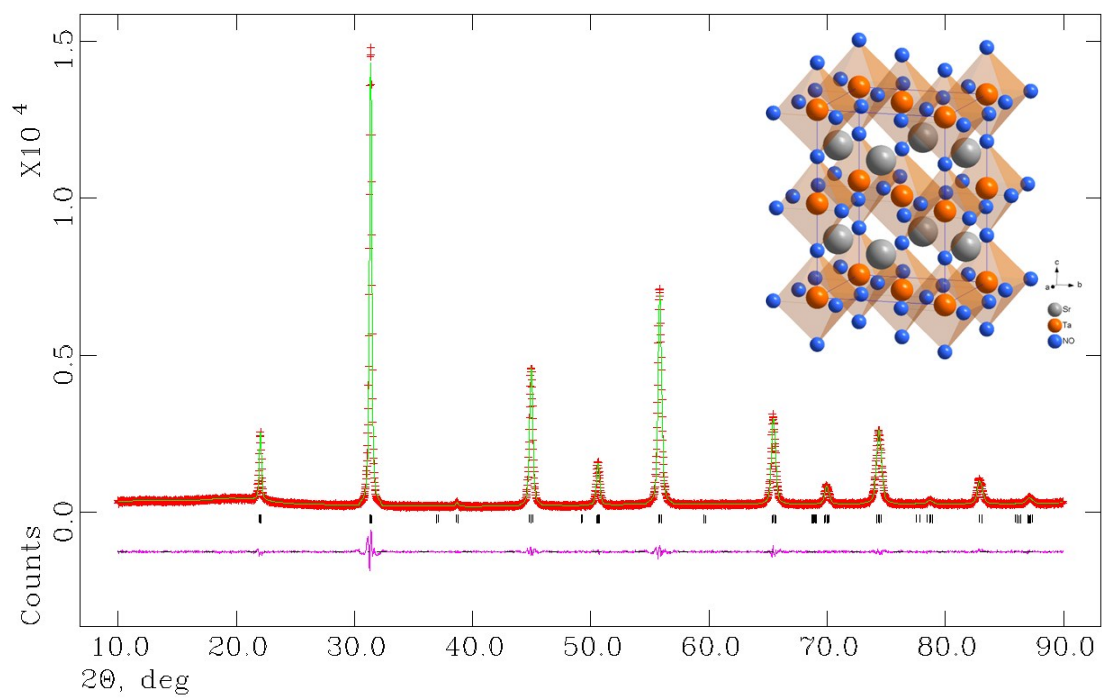

Figure S2. Observed and calculated X-ray powder diffraction patterns of SrTaO<sub>2</sub>N with space group *I4mcm* ( $R_p = 6.05\%$ ,  $R_{wp} = 4.49\%$ ,  $\chi^2 = 1.656$ )

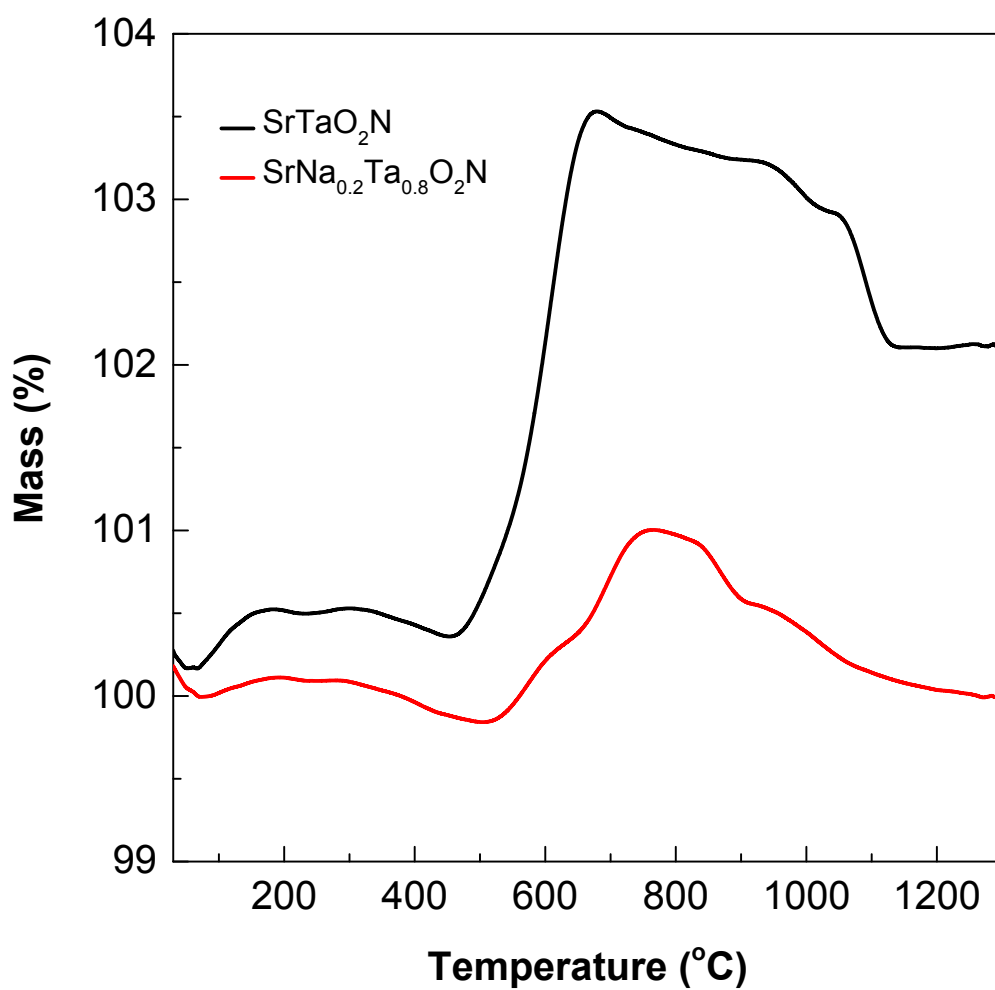

Figure S3. Thermogravimetric analysis (TGA) of SrTaO<sub>2</sub>N and SrNa<sub>0.2</sub>Ta<sub>0.8</sub>O<sub>2.8</sub>N<sub>0.2</sub> in air with a heating rate 20 K/min

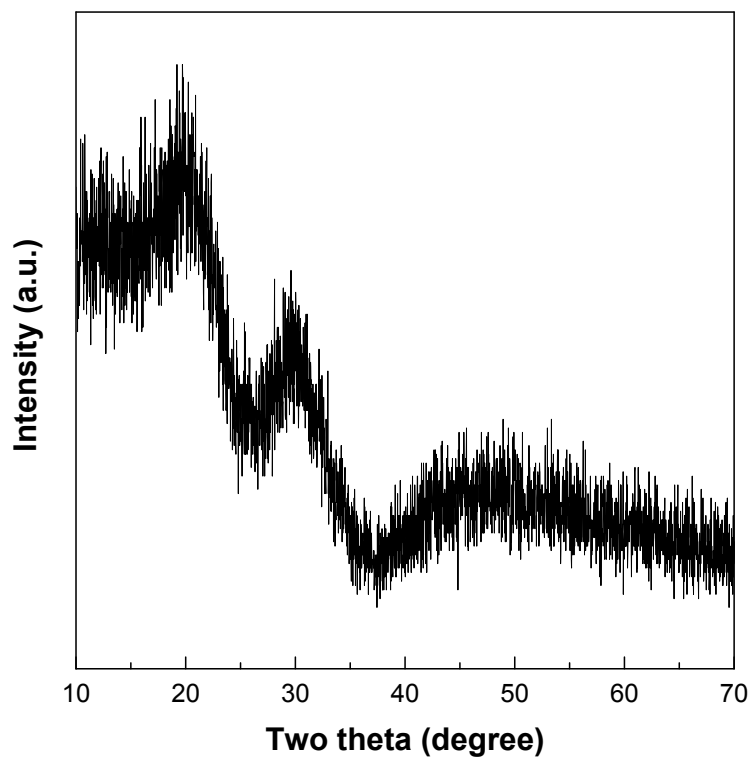

Figure S4. XRD patterns of precursors for  $\text{SrNa}_{0.2}\text{Ta}_{0.8}\text{O}_{2.8}\text{N}_{0.2}$  before ammonolysis

Table S1 Compositions of samples determined by ICP and TGA analysis

|                                                            | Sr / at% | Na / at% | Ta / at% | O / at% | N / at% |
|------------------------------------------------------------|----------|----------|----------|---------|---------|
| $\text{SrTaO}_2\text{N}$                                   | 20.8     | -        | 19.2     | 41.2    | 18.8    |
| $\text{SrNa}_{0.2}\text{Ta}_{0.8}\text{O}_{2.8}\text{N}_0$ | 21.2     | 3.6      | 15.2     | 55.2    | 4.8     |
